# Supplementary material for: Efficacy and safety of rotigotine in elderly patients with Parkinson’s disease in comparison with the non-elderly: a post hoc analysis of randomized, double-blind, placebo-controlled trials
Source: Springer Nature journal article supplement (doi:10.1007/s00415-017-8671-0), 2017-11-21
Supplement: MOESM1 [file 15240102]

Efficacy and safety of rotigotine in elderly compared to non-elderly Parkinson's disease patients: a post-hoc analysis of randomized, double-blind, placebo-controlled trials.

Masahiro Nomoto, Hirotaka Iwaki, Hiroyuki Kondo, Masaya Sakurai

Corresponding author

Masahiro Nomoto

Department of Neurology and Clinical Pharmacology, Ehime University Hospital, Shitsukawa, Ehime, Japan

E-mail: nomoto@m.ehime-u.ac.jp

Table S1. Disposition of patients in each trial.

| Trial                             | SS         |         |       | FAS        |         |       |
|-----------------------------------|------------|---------|-------|------------|---------|-------|
|                                   | Rotigotine | Placebo | Total | Rotigotine | Placebo | Total |
| Combination therapy with levodopa |            |         |       |            |         |       |
| NCT01628848                       | 87         | 87      | 174   | 86         | 86      | 172   |
| NCT01628926                       | 168        | 85      | 253   | 164        | 84      | 248   |
| total                             | 255        | 172     | 427   | 250        | 170     | 420   |
| Monotherapy                       |            |         |       |            |         |       |
| NCT01628965                       | 90         | 90      | 180   | 88         | 88      | 176   |

SS, safety set: patients in the randomized sample who underwent treatment at least once with rotigotine or placebo except those who violated good clinical practice.

FAS, full analysis set: among safety set patients, those who had at least one post-baseline evaluation for efficacy measures and did not violate inclusion/exclusion criteria.

Table S2. Summary of rotigotine dosage in this study.

| Trial                             | Elderly /Non-elderly | Group      | Statistic | Maintenance dosage* (mg/24h) | Maximum dosage* (mg/24h) | Mean dosage* (mg/24h) |      |
|-----------------------------------|----------------------|------------|-----------|------------------------------|--------------------------|-----------------------|------|
| Combination therapy with levodopa | Elderly              | Rotigotine | n         | 82                           | 86                       | 86                    |      |
|                                   |                      |            | Mean      | 13.4                         | 13.6                     | 9.9                   |      |
|                                   |                      |            | SD        | 3.8                          | 3.6                      | 2.5                   |      |
|                                   |                      |            | Minimum   | 2.0                          | 2.0                      | 2.0                   |      |
|                                   |                      |            | Median    | 16.0                         | 16.0                     | 10.9                  |      |
|                                   |                      |            |           | Maximum                      | 16.0                     | 16.0                  | 12.4 |
|                                   | Non-elderly          | Rotigotine | n         | 152                          | 164                      | 164                   |      |
|                                   |                      |            | Mean      | 12.5                         | 12.7                     | 9.3                   |      |
|                                   |                      |            | SD        | 3.9                          | 3.8                      | 2.8                   |      |
|                                   |                      |            | Minimum   | 4.0                          | 2.0                      | 2.0                   |      |
| Median                            |                      |            | 14.0      | 14.0                         | 9.8                      |                       |      |
|                                   |                      |            | Maximum   | 16.0                         | 16.0                     | 12.4                  |      |
| Monotherapy                       | Elderly              | Rotigotine | n         | 26                           | 28                       | 28                    |      |
|                                   |                      |            | Mean      | 13.1                         | 13.1                     | 9.1                   |      |
|                                   |                      |            | SD        | 3.9                          | 3.8                      | 2.4                   |      |
|                                   |                      |            | Minimum   | 6.0                          | 4.0                      | 3.1                   |      |
|                                   |                      |            | Median    | 16.0                         | 16.0                     | 10.5                  |      |
|                                   |                      |            |           | Maximum                      | 16.0                     | 16.0                  | 11.3 |
|                                   | Non-elderly          | Rotigotine | n         | 56                           | 60                       | 60                    |      |
|                                   |                      |            | Mean      | 12.7                         | 12.7                     | 8.9                   |      |
|                                   |                      |            | SD        | 4.0                          | 4.2                      | 2.6                   |      |
|                                   |                      |            | Minimum   | 4.0                          | 2.0                      | 0.0                   |      |
| Median                            |                      |            | 16.0      | 16.0                         | 10.3                     |                       |      |
|                                   |                      |            | Maximum   | 16.0                         | 16.0                     | 11.3                  |      |

SD, standard deviation. \*The dosage of placebo is defined as a patch of the same size as the rotigotine transdermal patch.

Table S3. Change in UPDRS scores related to (A) motor symptoms and (B) gait disturbance, from baseline to the end of maintenance period.

(A)

| PD motor symptom                   | Trial                             | Elderly /Non-elderly | Group      | n   | Change mean | Treatment comparison (Rotigotine-Placebo) <sup>a)</sup> |                         |          |
|------------------------------------|-----------------------------------|----------------------|------------|-----|-------------|---------------------------------------------------------|-------------------------|----------|
|                                    |                                   |                      |            |     |             | Point estimation                                        | 95% confidence interval | p value  |
| Tremor <sup>b)</sup>               | Combination therapy with levodopa | Elderly              | Rotigotine | 86  | -2.45       | -1.63                                                   | -2.65, -0.61            | 0.0020   |
|                                    |                                   |                      | Placebo    | 68  | -0.82       |                                                         |                         |          |
|                                    |                                   | Non-elderly          | Rotigotine | 164 | -2.10       | -1.19                                                   | -1.86, -0.52            | 0.0006   |
|                                    |                                   |                      | Placebo    | 102 | -0.91       |                                                         |                         |          |
|                                    |                                   | Total                | Rotigotine | 250 | -2.22       | -1.34                                                   | -1.91, -0.78            | < 0.0001 |
|                                    |                                   |                      | Placebo    | 170 | -0.88       |                                                         |                         |          |
|                                    | Monotherapy                       | Elderly              | Rotigotine | 28  | -1.68       | -0.74                                                   | -1.76, 0.27             | 0.1486   |
|                                    |                                   |                      | Placebo    | 31  | -0.94       |                                                         |                         |          |
|                                    |                                   | Non-elderly          | Rotigotine | 60  | -1.93       | -1.32                                                   | -2.12, -0.51            | 0.0015   |
|                                    |                                   |                      | Placebo    | 57  | -0.61       |                                                         |                         |          |
|                                    |                                   | Total                | Rotigotine | 88  | -1.85       | -1.13                                                   | -1.75, -0.50            | 0.0005   |
|                                    |                                   |                      | Placebo    | 88  | -0.73       |                                                         |                         |          |
| Rigidity <sup>c)</sup>             | Combination therapy with levodopa | Elderly              | Rotigotine | 86  | -2.13       | -0.7                                                    | -1.47, 0.07             | 0.0735   |
|                                    |                                   |                      | Placebo    | 68  | -1.43       |                                                         |                         |          |
|                                    |                                   | Non-elderly          | Rotigotine | 164 | -2.68       | -1.38                                                   | -1.98, -0.78            | < 0.0001 |
|                                    |                                   |                      | Placebo    | 102 | -1.30       |                                                         |                         |          |
|                                    |                                   | Total                | Rotigotine | 250 | -2.49       | -1.14                                                   | -1.61, -0.67            | < 0.0001 |
|                                    |                                   |                      | Placebo    | 170 | -1.35       |                                                         |                         |          |
|                                    | Monotherapy                       | Elderly              | Rotigotine | 28  | -1.86       | -0.6                                                    | -1.82, 0.63             | 0.3312   |
|                                    |                                   |                      | Placebo    | 31  | -1.26       |                                                         |                         |          |
|                                    |                                   | Non-elderly          | Rotigotine | 60  | -1.43       | -0.7                                                    | -1.52, 0.13             | 0.0979   |
|                                    |                                   |                      | Placebo    | 57  | -0.74       |                                                         |                         |          |
|                                    |                                   | Total                | Rotigotine | 88  | -1.57       | -0.65                                                   | -1.33, 0.03             | 0.0617   |
|                                    |                                   |                      | Placebo    | 88  | -0.92       |                                                         |                         |          |
| Akinesia <sup>d)</sup>             | Combination therapy with levodopa | Elderly              | Rotigotine | 86  | -4.79       | -2.14                                                   | -3.86, -0.43            | 0.0147   |
|                                    |                                   |                      | Placebo    | 68  | -2.65       |                                                         |                         |          |
|                                    |                                   | Non-elderly          | Rotigotine | 164 | -6.13       | -3.53                                                   | -4.74, -2.32            | < 0.0001 |
|                                    |                                   |                      | Placebo    | 102 | -2.61       |                                                         |                         |          |
|                                    |                                   | Total                | Rotigotine | 250 | -5.67       | -3.05                                                   | -4.04, -2.06            | < 0.0001 |
|                                    |                                   |                      | Placebo    | 170 | -2.62       |                                                         |                         |          |
|                                    | Monotherapy                       | Elderly              | Rotigotine | 28  | -3.86       | -0.99                                                   | -3.41, 1.44             | 0.4190   |
|                                    |                                   |                      | Placebo    | 31  | -2.87       |                                                         |                         |          |
|                                    |                                   | Non-elderly          | Rotigotine | 60  | -3.23       | -2.01                                                   | -3.33, -0.68            | 0.0033   |
|                                    |                                   |                      | Placebo    | 57  | -1.23       |                                                         |                         |          |
|                                    |                                   | Total                | Rotigotine | 88  | -3.43       | -1.63                                                   | -2.82, -0.43            | 0.0078   |
|                                    |                                   |                      | Placebo    | 88  | -1.81       |                                                         |                         |          |
| Postural instability <sup>e)</sup> | Combination therapy with levodopa | Elderly              | Rotigotine | 86  | -0.72       | -0.41                                                   | -0.94, 0.12             | 0.1286   |
|                                    |                                   |                      | Placebo    | 68  | -0.31       |                                                         |                         |          |
|                                    |                                   | Non-elderly          | Rotigotine | 164 | -0.98       | -0.72                                                   | -1.07, -0.38            | < 0.0001 |
|                                    |                                   |                      | Placebo    | 102 | -0.25       |                                                         |                         |          |
|                                    |                                   | Total                | Rotigotine | 250 | -0.89       | -0.61                                                   | -0.90, -0.32            | < 0.0001 |
|                                    |                                   |                      | Placebo    | 170 | -0.28       |                                                         |                         |          |
|                                    | Monotherapy                       | Elderly              | Rotigotine | 28  | -0.71       | -0.29                                                   | -1.16, 0.57             | 0.4986   |
|                                    |                                   |                      | Placebo    | 31  | -0.42       |                                                         |                         |          |
|                                    |                                   | Non-elderly          | Rotigotine | 60  | -0.40       | -0.44                                                   | -0.91, 0.04             | 0.0701   |
|                                    |                                   |                      | Placebo    | 57  | 0.04        |                                                         |                         |          |
|                                    |                                   | Total                | Rotigotine | 88  | -0.50       | -0.38                                                   | -0.80, 0.05             | 0.0828   |
|                                    |                                   |                      | Placebo    | 88  | -0.13       |                                                         |                         |          |

a) Equal variances assumed; b) Total score of UPDRS items 16 (tremor), 20 (tremor at rest), and 21 (action or postural tremor of hands); c) Score of UPDRS item 22 (rigidity); d) Total score of UPDRS items 8 (handwriting), 10 (dressing), 11 (hygiene), 12 (turning in bed and adjusting bed clothes), 18 (speech), 19 (facial expression), 23 (finger taps), 24 (hand movements), 25 (rapid alternating movements of hands), 26 (leg agility), and 31 (body bradykinesia and hypokinesia); e) Total score of UPDRS items 27 (arising from chair), 28 (posture), and 30 (postural stability).

(B)

| Trial                             | Elderly /Non-elderly | Group      | n   | Change mean | Treatment comparison (Rotigotine-Placebo) <sup>a)</sup> |                         |          |
|-----------------------------------|----------------------|------------|-----|-------------|---------------------------------------------------------|-------------------------|----------|
|                                   |                      |            |     |             | Point estimation                                        | 95% confidence interval | p value  |
| Combination therapy with levodopa | Elderly              | Rotigotine | 86  | -1.07       | -0.81                                                   | -1.36, -0.25            | 0.0050   |
|                                   |                      | Placebo    | 68  | -0.26       |                                                         |                         |          |
|                                   | Non-elderly          | Rotigotine | 164 | -1.05       | -0.68                                                   | -1.07, -0.29            | 0.0007   |
|                                   |                      | Placebo    | 102 | -0.37       |                                                         |                         |          |
|                                   | Total                | Rotigotine | 250 | -1.06       | -0.73                                                   | -1.05, -0.41            | < 0.0001 |
|                                   |                      | Placebo    | 170 | -0.33       |                                                         |                         |          |
| Monotherapy                       | Elderly              | Rotigotine | 28  | -0.54       | -0.02                                                   | -0.82, 0.78             | 0.9612   |
|                                   |                      | Placebo    | 31  | -0.52       |                                                         |                         |          |
|                                   | Non-elderly          | Rotigotine | 60  | -0.63       | -0.58                                                   | -1.10, -0.07            | 0.0273   |
|                                   |                      | Placebo    | 57  | -0.05       |                                                         |                         |          |
|                                   | Total                | Rotigotine | 88  | -0.60       | -0.39                                                   | -0.82, 0.05             | 0.0790   |
|                                   |                      | Placebo    | 88  | -0.22       |                                                         |                         |          |

Total score of UPDRS items 13 (falling), 14 (freezing when walking), 15 (walking), and 29 (gait); a) Equal variances assumed.

Table S4. Change in each UPDRS item score from baseline to the end of maintenance period.

| UPDRS item                   | Trial                                   | Elderly<br>/Non-elderly | Group      | n     | Change<br>mean | Treatment comparison<br>(Rotigotine - Placebo) <sup>a)</sup> |                               |         |
|------------------------------|-----------------------------------------|-------------------------|------------|-------|----------------|--------------------------------------------------------------|-------------------------------|---------|
|                              |                                         |                         |            |       |                | Point<br>estimation                                          | 95%<br>confidence<br>interval | p value |
| 3: Depression                | Combination<br>therapy with<br>levodopa | Elderly                 | Rotigotine | 86    | -0.16          | -0.19                                                        | -0.36, -0.02                  | 0.0286  |
|                              |                                         |                         | Placebo    | 68    | 0.03           |                                                              |                               |         |
|                              |                                         | Non-elderly             | Rotigotine | 164   | -0.15          | -0.10                                                        | -0.21, 0.01                   | 0.0656  |
|                              | Placebo                                 |                         | 102        | -0.05 |                |                                                              |                               |         |
|                              | Total                                   | Rotigotine              | 250        | -0.16 | -0.14          | -0.23, -0.04                                                 | 0.0039                        |         |
|                              |                                         | Placebo                 | 170        | -0.02 |                |                                                              |                               |         |
|                              | Monotherapy                             | Elderly                 | Rotigotine | 28    | -0.21          | -0.15                                                        | -0.37, 0.08                   | 0.1878  |
|                              |                                         |                         | Placebo    | 31    | -0.06          |                                                              |                               |         |
|                              |                                         | Non-elderly             | Rotigotine | 60    | -0.08          | -0.14                                                        | -0.31, 0.04                   | 0.1350  |
| Placebo                      | 57                                      |                         | 0.05       |       |                |                                                              |                               |         |
| Total                        | Rotigotine                              | 88                      | -0.13      | -0.14 | -0.28, 0.00    | 0.0565                                                       |                               |         |
|                              | Placebo                                 | 88                      | 0.01       |       |                |                                                              |                               |         |
| 4: Motivation<br>/Initiative | Combination<br>therapy with<br>levodopa | Elderly                 | Rotigotine | 86    | -0.21          | -0.24                                                        | -0.44, -0.04                  | 0.0207  |
|                              |                                         |                         | Placebo    | 68    | 0.03           |                                                              |                               |         |
|                              |                                         | Non-elderly             | Rotigotine | 164   | -0.22          | -0.20                                                        | -0.34, -0.06                  | 0.0048  |
|                              | Placebo                                 |                         | 102        | -0.02 |                |                                                              |                               |         |
|                              | Total                                   | Rotigotine              | 250        | -0.22 | -0.22          | -0.33, -0.10                                                 | 0.0002                        |         |
|                              |                                         | Placebo                 | 170        | 0.00  |                |                                                              |                               |         |
|                              | Monotherapy                             | Elderly                 | Rotigotine | 28    | -0.25          | -0.15                                                        | -0.46, 0.16                   | 0.3248  |
|                              |                                         |                         | Placebo    | 31    | -0.10          |                                                              |                               |         |
|                              |                                         | Non-elderly             | Rotigotine | 60    | -0.07          | -0.03                                                        | -0.17, 0.10                   | 0.6445  |
| Placebo                      | 57                                      |                         | -0.04      |       |                |                                                              |                               |         |
| Total                        | Rotigotine                              | 88                      | -0.13      | -0.07 | -0.20, 0.07    | 0.3237                                                       |                               |         |
|                              | Placebo                                 | 88                      | -0.06      |       |                |                                                              |                               |         |
| 10: Dressing                 | Combination<br>therapy with<br>levodopa | Elderly                 | Rotigotine | 86    | -0.26          | -0.17                                                        | -0.35, 0.02                   | 0.0790  |
|                              |                                         |                         | Placebo    | 68    | -0.09          |                                                              |                               |         |
|                              |                                         | Non-elderly             | Rotigotine | 164   | -0.21          | -0.10                                                        | -0.23, 0.03                   | 0.1234  |
|                              | Placebo                                 |                         | 102        | -0.11 |                |                                                              |                               |         |
|                              | Total                                   | Rotigotine              | 250        | -0.22 | -0.12          | -0.23, -0.02                                                 | 0.0208                        |         |
|                              |                                         | Placebo                 | 170        | -0.10 |                |                                                              |                               |         |
|                              | Monotherapy                             | Elderly                 | Rotigotine | 28    | -0.04          | 0.19                                                         | -0.07, 0.45                   | 0.1521  |
|                              |                                         |                         | Placebo    | 31    | -0.23          |                                                              |                               |         |
|                              |                                         | Non-elderly             | Rotigotine | 60    | -0.13          | -0.10                                                        | -0.25, 0.05                   | 0.1923  |
| Placebo                      | 57                                      |                         | -0.04      |       |                |                                                              |                               |         |
| Total                        | Rotigotine                              | 88                      | -0.10      | 0.00  | -0.13, 0.13    | 1.0000                                                       |                               |         |
|                              | Placebo                                 | 88                      | -0.10      |       |                |                                                              |                               |         |

(Continued)

| UPDRS item                                   | Trial                             | Elderly /Non-elderly | Group      | n     | Change mean  | Treatment comparison (Rotigotine - Placebo) <sup>a)</sup> |                         |         |
|----------------------------------------------|-----------------------------------|----------------------|------------|-------|--------------|-----------------------------------------------------------|-------------------------|---------|
|                                              |                                   |                      |            |       |              | Point estimation                                          | 95% confidence interval | p value |
| 11: Hygiene                                  | Combination therapy with levodopa | Elderly              | Rotigotine | 86    | -0.19        | -0.19                                                     | -0.36, -0.02            | 0.0327  |
|                                              |                                   |                      | Placebo    | 68    | 0.00         |                                                           |                         |         |
|                                              |                                   | Non-elderly          | Rotigotine | 164   | -0.21        | -0.12                                                     | -0.25, 0.02             | 0.0905  |
|                                              | Placebo                           |                      | 102        | -0.10 |              |                                                           |                         |         |
|                                              | Total                             | Rotigotine           | 250        | -0.20 | -0.15        | -0.25, -0.04                                              | 0.0067                  |         |
|                                              |                                   | Placebo              | 170        | -0.06 |              |                                                           |                         |         |
|                                              | Monotherapy                       | Elderly              | Rotigotine | 28    | -0.07        | 0.06                                                      | -0.30, 0.42             | 0.7509  |
|                                              |                                   |                      | Placebo    | 31    | -0.13        |                                                           |                         |         |
|                                              |                                   | Non-elderly          | Rotigotine | 60    | -0.05        | -0.09                                                     | -0.22, 0.05             | 0.2020  |
| Placebo                                      | 57                                |                      | 0.04       |       |              |                                                           |                         |         |
| Total                                        | Rotigotine                        | 88                   | -0.06      | -0.03 | -0.18, 0.11  | 0.6485                                                    |                         |         |
|                                              | Placebo                           | 88                   | -0.02      |       |              |                                                           |                         |         |
| 12: Turning in bed and adjusting bed clothes | Combination therapy with levodopa | Elderly              | Rotigotine | 86    | -0.28        | -0.23                                                     | -0.44, -0.03            | 0.0250  |
|                                              |                                   |                      | Placebo    | 68    | -0.04        |                                                           |                         |         |
|                                              |                                   | Non-elderly          | Rotigotine | 164   | -0.24        | -0.12                                                     | -0.24, 0.00             | 0.0546  |
|                                              | Placebo                           |                      | 102        | -0.12 |              |                                                           |                         |         |
|                                              | Total                             | Rotigotine           | 250        | -0.25 | -0.16        | -0.27, -0.06                                              | 0.0029                  |         |
|                                              |                                   | Placebo              | 170        | -0.09 |              |                                                           |                         |         |
|                                              | Monotherapy                       | Elderly              | Rotigotine | 28    | -0.11        | -0.01                                                     | -0.33, 0.31             | 0.9485  |
|                                              |                                   |                      | Placebo    | 31    | -0.10        |                                                           |                         |         |
|                                              |                                   | Non-elderly          | Rotigotine | 60    | -0.15        | -0.06                                                     | -0.23, 0.11             | 0.4645  |
| Placebo                                      | 57                                |                      | -0.09      |       |              |                                                           |                         |         |
| Total                                        | Rotigotine                        | 88                   | -0.14      | -0.05 | -0.20, 0.11  | 0.5568                                                    |                         |         |
|                                              | Placebo                           | 88                   | -0.09      |       |              |                                                           |                         |         |
| 13: Falling (Unrelated to freezing)          | Combination therapy with levodopa | Elderly              | Rotigotine | 86    | -0.19        | -0.14                                                     | -0.33, 0.05             | 0.1439  |
|                                              |                                   |                      | Placebo    | 68    | -0.04        |                                                           |                         |         |
|                                              |                                   | Non-elderly          | Rotigotine | 164   | -0.14        | -0.10                                                     | -0.20, -0.00            | 0.0446  |
|                                              | Placebo                           |                      | 102        | -0.04 |              |                                                           |                         |         |
|                                              | Total                             | Rotigotine           | 250        | -0.16 | -0.11        | -0.21, -0.02                                              | 0.0162                  |         |
|                                              |                                   | Placebo              | 170        | -0.04 |              |                                                           |                         |         |
|                                              | Monotherapy                       | Elderly              | Rotigotine | 28    | 0.07         | 0.14                                                      | -0.16, 0.43             | 0.3537  |
|                                              |                                   |                      | Placebo    | 31    | -0.06        |                                                           |                         |         |
|                                              |                                   | Non-elderly          | Rotigotine | 60    | -0.07        | 0.02                                                      | -0.11, 0.15             | 0.7474  |
| Placebo                                      | 57                                |                      | -0.09      |       |              |                                                           |                         |         |
| Total                                        | Rotigotine                        | 88                   | -0.02      | 0.06  | -0.07, 0.19  | 0.3836                                                    |                         |         |
|                                              | Placebo                           | 88                   | -0.08      |       |              |                                                           |                         |         |
| 14: Freezing when walking                    | Combination therapy with levodopa | Elderly              | Rotigotine | 86    | -0.24        | -0.14                                                     | -0.35, 0.07             | 0.1890  |
|                                              |                                   |                      | Placebo    | 68    | -0.10        |                                                           |                         |         |
|                                              |                                   | Non-elderly          | Rotigotine | 164   | -0.24        | -0.23                                                     | -0.39, -0.08            | 0.0036  |
|                                              | Placebo                           |                      | 102        | -0.01 |              |                                                           |                         |         |
|                                              | Total                             | Rotigotine           | 250        | -0.24 | -0.20        | -0.32, -0.07                                              | 0.0021                  |         |
|                                              |                                   | Placebo              | 170        | -0.05 |              |                                                           |                         |         |
|                                              | Monotherapy                       | Elderly              | Rotigotine | 28    | -0.18        | -0.15                                                     | -0.33, 0.04             | 0.1167  |
|                                              |                                   |                      | Placebo    | 31    | -0.03        |                                                           |                         |         |
|                                              |                                   | Non-elderly          | Rotigotine | 60    | -0.17        | -0.24                                                     | -0.46, -0.01            | 0.0408  |
| Placebo                                      | 57                                |                      | 0.07       |       |              |                                                           |                         |         |
| Total                                        | Rotigotine                        | 88                   | -0.17      | -0.20 | -0.37, -0.04 | 0.0134                                                    |                         |         |
|                                              | Placebo                           | 88                   | 0.03       |       |              |                                                           |                         |         |

(Continued)

| UPDRS item             | Trial                             | Elderly /Non-elderly | Group      | n     | Change mean | Treatment comparison (Rotigotine - Placebo) <sup>a)</sup> |                         |         |
|------------------------|-----------------------------------|----------------------|------------|-------|-------------|-----------------------------------------------------------|-------------------------|---------|
|                        |                                   |                      |            |       |             | Point estimation                                          | 95% confidence interval | p value |
| 27: Arising from Chair | Combination therapy with levodopa | Elderly              | Rotigotine | 86    | -0.16       | -0.12                                                     | -0.38, 0.14             | 0.3653  |
|                        |                                   |                      | Placebo    | 68    | -0.04       |                                                           |                         |         |
|                        |                                   | Non-elderly          | Rotigotine | 164   | -0.30       | -0.26                                                     | -0.42, -0.10            | 0.0016  |
|                        | Placebo                           |                      | 102        | -0.04 |             |                                                           |                         |         |
|                        | Total                             | Rotigotine           | 250        | -0.25 | -0.21       | -0.35, -0.07                                              | 0.0029                  |         |
|                        |                                   | Placebo              | 170        | -0.04 |             |                                                           |                         |         |
|                        | Monotherapy                       | Elderly              | Rotigotine | 28    | -0.18       | -0.02                                                     | -0.34, 0.31             | 0.9160  |
|                        |                                   |                      | Placebo    | 31    | -0.16       |                                                           |                         |         |
|                        |                                   | Non-elderly          | Rotigotine | 60    | -0.10       | -0.15                                                     | -0.35, 0.05             | 0.1332  |
| Placebo                | 57                                |                      | 0.05       |       |             |                                                           |                         |         |
| Total                  | Rotigotine                        | 88                   | -0.13      | -0.10 | -0.27, 0.07 | 0.2399                                                    |                         |         |
|                        | Placebo                           | 88                   | -0.02      |       |             |                                                           |                         |         |
| 29: Gait               | Combination therapy with levodopa | Elderly              | Rotigotine | 86    | -0.36       | -0.30                                                     | -0.50, -0.10            | 0.0035  |
|                        |                                   |                      | Placebo    | 68    | -0.06       |                                                           |                         |         |
|                        |                                   | Non-elderly          | Rotigotine | 164   | -0.32       | -0.07                                                     | -0.22, 0.08             | 0.3732  |
|                        | Placebo                           |                      | 102        | -0.25 |             |                                                           |                         |         |
|                        | Total                             | Rotigotine           | 250        | -0.34 | -0.16       | -0.28, -0.04                                              | 0.0095                  |         |
|                        |                                   | Placebo              | 170        | -0.18 |             |                                                           |                         |         |
|                        | Monotherapy                       | Elderly              | Rotigotine | 28    | -0.21       | -0.02                                                     | -0.29, 0.25             | 0.8795  |
|                        |                                   |                      | Placebo    | 31    | -0.19       |                                                           |                         |         |
|                        |                                   | Non-elderly          | Rotigotine | 60    | -0.20       | -0.22                                                     | -0.41, -0.03            | 0.0244  |
| Placebo                | 57                                |                      | 0.02       |       |             |                                                           |                         |         |
| Total                  | Rotigotine                        | 88                   | -0.20      | -0.15 | -0.30, 0.01 | 0.0611                                                    |                         |         |
|                        | Placebo                           | 88                   | -0.06      |       |             |                                                           |                         |         |
| 30: Postural Stability | Combination therapy with levodopa | Elderly              | Rotigotine | 86    | -0.33       | -0.13                                                     | -0.37, 0.10             | 0.2595  |
|                        |                                   |                      | Placebo    | 68    | -0.19       |                                                           |                         |         |
|                        |                                   | Non-elderly          | Rotigotine | 164   | -0.39       | -0.18                                                     | -0.34, -0.03            | 0.0216  |
|                        | Placebo                           |                      | 102        | -0.21 |             |                                                           |                         |         |
|                        | Total                             | Rotigotine           | 250        | -0.37 | -0.17       | -0.30, -0.04                                              | 0.0120                  |         |
|                        |                                   | Placebo              | 170        | -0.20 |             |                                                           |                         |         |
|                        | Monotherapy                       | Elderly              | Rotigotine | 28    | -0.21       | -0.12                                                     | -0.52, 0.28             | 0.5585  |
|                        |                                   |                      | Placebo    | 31    | -0.10       |                                                           |                         |         |
|                        |                                   | Non-elderly          | Rotigotine | 60    | -0.18       | -0.11                                                     | -0.33, 0.10             | 0.3059  |
| Placebo                | 57                                |                      | -0.07      |       |             |                                                           |                         |         |
| Total                  | Rotigotine                        | 88                   | -0.19      | -0.11 | -0.31, 0.08 | 0.2498                                                    |                         |         |
|                        | Placebo                           | 88                   | -0.08      |       |             |                                                           |                         |         |

a) Equal variances assumed

Table S5. Change in OFF time from baseline to the end of maintenance period.

| Trial                                   | Elderly<br>/Non-elderly | Group      | n   | Change<br>mean | Treatment comparison (Rotigotine - Placebo) <sup>a)</sup> |                               |         |
|-----------------------------------------|-------------------------|------------|-----|----------------|-----------------------------------------------------------|-------------------------------|---------|
|                                         |                         |            |     |                | Point<br>estimation                                       | 95%<br>confidence<br>interval | p value |
| Combination<br>therapy with<br>levodopa | Elderly                 | Rotigotine | 49  | -1.03          | -0.24                                                     | -1.43, 0.96                   | 0.6951  |
|                                         |                         | Placebo    | 40  | -0.79          |                                                           |                               |         |
|                                         | Non-elderly             | Rotigotine | 116 | -1.99          | -1.49                                                     | -2.32, -0.65                  | 0.0005  |
|                                         |                         | Placebo    | 73  | -0.50          |                                                           |                               |         |
|                                         | Total                   | Rotigotine | 165 | -1.71          | -1.10                                                     | -1.78, -0.42                  | 0.0017  |
|                                         |                         | Placebo    | 113 | -0.61          |                                                           |                               |         |

a) Equal variances assumed.



Table S6. Change in total UPDRS Part I score from baseline to the end of maintenance period.

| Trial                                   | Elderly/Non-elderly | Group      | n   | Change<br>mean | Treatment comparison (Rotigotine - Placebo) <sup>a)</sup> |                            |         |
|-----------------------------------------|---------------------|------------|-----|----------------|-----------------------------------------------------------|----------------------------|---------|
|                                         |                     |            |     |                | Point estimation                                          | 95%<br>confidence interval | p value |
| Combination<br>therapy with<br>levodopa | Elderly             | Rotigotine | 86  | -0.24          | -0.32                                                     | -0.72, 0.08                | 0.1170  |
|                                         |                     | Placebo    | 68  | 0.07           |                                                           |                            |         |
|                                         | Non-elderly         | Rotigotine | 164 | -0.31          | -0.25                                                     | -0.52, 0.02                | 0.0656  |
|                                         |                     | Placebo    | 102 | -0.06          |                                                           |                            |         |
|                                         | Total               | Rotigotine | 250 | -0.29          | -0.28                                                     | -0.51, -0.06               | 0.0133  |
|                                         |                     | Placebo    | 170 | -0.01          |                                                           |                            |         |
| Monotherapy                             | Elderly             | Rotigotine | 28  | -0.39          | -0.23                                                     | -0.79, 0.33                | 0.4086  |
|                                         |                     | Placebo    | 31  | -0.16          |                                                           |                            |         |
|                                         | Non-elderly         | Rotigotine | 60  | -0.18          | -0.20                                                     | -0.49, 0.09                | 0.1783  |
|                                         |                     | Placebo    | 57  | 0.02           |                                                           |                            |         |
|                                         | Total               | Rotigotine | 88  | -0.25          | -0.20                                                     | -0.47, 0.06                | 0.1326  |
|                                         |                     | Placebo    | 88  | -0.05          |                                                           |                            |         |

a) Equal variances assumed.

Table S7. Change in sum of UPDRS Part II and Part III scores from baseline to the end of maintenance period.

| Trial       | Elderly /Non-elderly | Group      | n  | Change mean | Treatment comparison (Rotigotine - Placebo) <sup>a)</sup> |                         |         |
|-------------|----------------------|------------|----|-------------|-----------------------------------------------------------|-------------------------|---------|
|             |                      |            |    |             | Point estimation                                          | 95% confidence interval | p value |
| Monotherapy | Elderly              | Rotigotine | 28 | -9.25       | -2.77                                                     | -7.89, 2.36             | 0.2847  |
|             |                      | Placebo    | 31 | -6.48       |                                                           |                         |         |
|             | Non-elderly          | Rotigotine | 60 | -8.02       | -5.24                                                     | -8.33, -2.16            | 0.0010  |
|             |                      | Placebo    | 57 | -2.77       |                                                           |                         |         |
|             | Total                | Rotigotine | 88 | -8.41       | -4.33                                                     | -7.00, -1.66            | 0.0016  |
|             |                      | Placebo    | 88 | -4.08       |                                                           |                         |         |

a) Equal variances assumed.
